# Supplementary material
Source: Springer Nature journal article supplement (https://www.springermedizin.de/resource/supplementary/12887_2011_698_MOESM4_ESM.pdf/9475840)

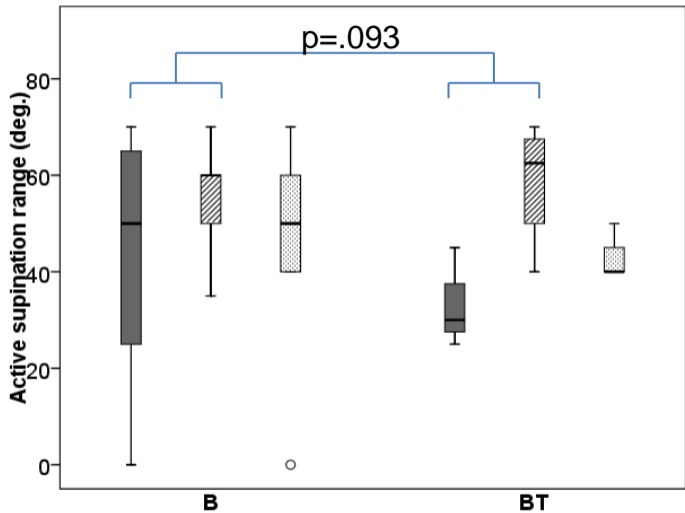

Supplement: MOESM4 [file 9475840]
